# Supplementary material for: Using Machine Learning Techniques to Predict MACE in Very Young Acute Coronary Syndrome Patients
Source: MDPI journal article supplement (doi:10.3390/diagnostics12020422), 2022-02-06
Supplement: s1 [file s1]

Supplementary Materials. Table S1, The whole list of variables

|                                                      |
|------------------------------------------------------|
| 1. Cases and control                                 |
| 2. Percutaneous coronary intervention (PCI) day      |
| 3. Data of hospital discharge                        |
| 4. Number of PCI                                     |
| 5. Previous revascularization                        |
| 6. Sex                                               |
| 7. Hypertension                                      |
| 8. Diabetes Mellitus                                 |
| 9. Smoking                                           |
| 10. Dyslipidaemia                                    |
| 11. Family History of Coronary Disease               |
| 12. Peripheral Vascular Disease                      |
| 13. Type of Previous revascularization               |
| 14. Previous myocardial infarction                   |
| 15. PREVIOUS Congestive Heart Failure                |
| 16. PREVIOUS Percutaneous Revascularization          |
| 17. Type of heart attack                             |
| 18. PRIOR Surgical Revascularization                 |
| 19. PREVIOUS stroke                                  |
| 20. RISK FACTORS NEW DIAGNOSIS                       |
| 21. Atrial Fibrillation                              |
| 22. Renal Insufficiency                              |
| 23. Depression                                       |
| 24. Cannabis                                         |
| 25. Heroin                                           |
| 26. Alcohol                                          |
| 27. Cocaine                                          |
| 28. Antiplatelet therapy (not ASA) Pre-PCI           |
| 29. Acetyl Salicylic Acid Pre-PCI                    |
| 30. Pre-PCI Anticoagulants                           |
| 31. Pre-PCI betablockers                             |
| 32. Pre-PCI Angiotensin-converting-enzyme inhibitors |
| 33. PCI Angiotensin II receptor blockers             |
| 34. Pre-PCI Calcium Channel Blockers                 |
| 35. Pre-PCI Statins                                  |
| 36. Pre-PCI Diuretics                                |
| 37. Pre-PCI Oral Antidiabetics                       |
| 38. Pre-PCI Antiarrhythmics                          |
| 39. Chest pain Symptoms on admission                 |
| 40. Dyspnoea Symptoms on Admission                   |
| 41. Syncope Symptoms on Admission                    |
| 42. Anatomical location of the AMI                   |
| 43. Total Cholesterol                                |
| 44. HDL cholesterol                                  |
| 45. LDL cholesterol                                  |

|                                                                     |
|---------------------------------------------------------------------|
| 46. Triglycerides                                                   |
| 47. Creatinine                                                      |
| 48. Glucose                                                         |
| 49. Indication for catheterization                                  |
| 50. Angioplasty modality                                            |
| 51. Discharge diagnosis                                             |
| 52. Type of complete or incomplete revascularization                |
| 53. Observed Left Ventricular Ejection Fraction (%)                 |
| 54. LVEF coded dichotomous good / bad (40 or less poorly preserved) |
| 55. Date of hospital admission                                      |
| 56. Hospitalization nights                                          |
| 57. IP2Y12 at hospital discharge                                    |
| 58. ASA at discharge from hospital                                  |
| 59. Anticoagulants at hospital discharge                            |
| 60. Beta-blockers at hospital discharge                             |
| 61. Angiotensin-converting-enzyme inhibitors at Hospital Discharge  |
| 62. PCI Angiotensin II receptor blockers at Hospital Discharge      |
| 63. Calcium channel blockers at hospital discharge                  |
| 64. Statins at hospital discharge                                   |
| 65. Diuretics at hospital discharge                                 |
| 66. Oral Contraceptives at hospital discharge                       |
| 67. Oral antidiabetic drugs at hospital discharge                   |
| 68. Antiarrhythmics at hospital discharge                           |
| 69. Time from PCI to date of follow-up in months                    |
| 70. Date when the follow-up was done                                |
| 71. New coronary revascularization during follow-up                 |
| 72. Date of the RE-PCI in the follow-up or end of follow-up         |
| 73. all revascularization of the treated lesion                     |
| 74. entire revascularization of the affected vessel                 |
| 75. all non-revascularization of the affected vessel                |
| 76. Death of the patient                                            |
| 77. Cause of death                                                  |
| 78. Exitus date or end of follow-up                                 |
| 79. Acute Myocardial Infarction during follow-up                    |
| 80. AMI date or end of follow-up                                    |
| 81. Cerebrovascular accident in the follow-up                       |
| 82. Date of stroke or end of follow-up                              |
| 83. Date of MACE or end of follow-up                                |
| 84. Combination of events YES / NO                                  |
| 85. Coronary Artery Status                                          |
| 86. Number of diseased vessels                                      |
| 87. Number of lesions treated                                       |
| 88. Number of vessels treated                                       |
| 89. Number of severe injuries > 75%                                 |
| 90. Number of non-severe injuries < 75%                             |
| 91. Number of stents per procedure                                  |

|                                                                                  |
|----------------------------------------------------------------------------------|
| 92. Coronary artery where the main lesion is located                             |
| 93. % of basal stenosis                                                          |
| 94. Basal TImi Flow Classification                                               |
| 95. AHA classification of the type of coronary lesion                            |
| 96. The lesion presents calcium                                                  |
| 97. Lesion presents thrombus                                                     |
| 98. Lesion located in a bifurcation                                              |
| 99. Type of treatment stent, balloon, thrombus aspiration, referred to surgery   |
| 100. 100% final stenosis                                                         |
| 101. PCI Final TImi Flow Classification                                          |
| 102. Result of the treatment SUCCESS / FAILURE                                   |
| 103. Reason for a non-PCI                                                        |
| 104. Thrombus aspiration has been performed                                      |
| 105. It has been possible to extract thrombus                                    |
| 106. Diameter of implanted stent                                                 |
| 107. Length of implanted stent                                                   |
| 108. Trade name of the implanted stent                                           |
| 109. Type of drug covers stent or conventional                                   |
| 110. Coronary artery where the 2 lesion treated in the same procedure is located |
| 111. % of basal stenosis lesion 2                                                |
| 112. Baseline TIMI flow classification lesion 2                                  |
| 113. Classification Flow TIMI final injury 2                                     |
| 114. Diameter of implanted stent lesion 2                                        |
| 115. Length of the implanted stent lesion 2                                      |
| 116. Trade name implanted stent lesion 2                                         |
| 117. Type of drug eluding stent or Bare Metal Stent                              |
